# Supplementary material for: Antibodies against 4 Atypical Post-Translational Protein Modifications in Patients with Rheumatoid Arthritis
Source: MDPI journal article supplement (doi:10.3390/diagnostics12020352), 2022-01-29
Supplement: s1 [file s1]

Supplementary Table S1

**OD obtained in the ELISA for the four anti-PTM antibodies in the patients with RA and the controls.** The results corresponding to each antigen with and without correction are shown as median values and the interquartile range (IQR). The comparison was done with the U of Mann-Whitney test.

| Antigen <sup>1</sup> | Correction <sup>2</sup> | Controls |               | RA patients |               | <i>P</i>             |
|----------------------|-------------------------|----------|---------------|-------------|---------------|----------------------|
|                      |                         | Median   | IQR           | Median      | IQR           |                      |
| ctr-CII              | -                       | 0.174    | 0.147/0.201   | 0.143       | 0.128/0.169   | 5.0x10 <sup>-9</sup> |
| HOCl-CII             | no                      | 0.160    | 0.142/0.187   | 0.141       | 0.127/0.172   | 3.1x10 <sup>-5</sup> |
| HOCl-CII             | yes                     | -0.004   | -0.020/0.005  | -0.002      | -0.011/0.008  | 0.01                 |
| NEG-CII              | no                      | 0.221    | 0.163/0.305   | 0.234       | 0.171/0.285   | 0.5                  |
| NEG-CII              | yes                     | 0.027    | -0.010/0.099  | 0.072       | 0.016/0.119   | 0.0003               |
|                      |                         |          |               |             |               |                      |
| ctr-SynP             | -                       | 0.020    | 0.008/0.026   | 0.022       | 0.009/0.033   | 0.1                  |
| NO2-SynP             | no                      | 0.011    | 0.008/0.035   | 0.018       | 0.009/0.028   | 0.1                  |
| NO2-SynP             | yes                     | -0.011   | -0.031/0.009  | -0.009      | -0.022/0.005  | 0.7                  |
| ctr-pep              | -                       | 0.097    | 0.090/0.106   | 0.111       | 0.089/0.150   | 0.02                 |
| 3-NT-pep             | no                      | 0.209    | 0.190/0.230   | 0.250       | 0.201/0.329   | 0.02                 |
| 3-NT-pep             | yes                     | 0.113    | 0.100/0.133   | 0.137       | 0.097/0.185   | 0.1                  |
|                      |                         |          |               |             |               |                      |
| ctr-SynP             | -                       | 0.186    | 0.171/0.221   | 0.211       | 0.181/0.229   | 0.04                 |
| Hcy-SynP             | no                      | 0.145    | 0.130/0.155   | 0.160       | 0.145/0.178   | 0.0001               |
| Hcy-SynP             | yes                     | -0.038   | -0.069/-0.020 | -0.041      | -0.074/-0.015 | 0.5                  |

<sup>1</sup> Abbreviations: ctr = unmodified control protein or peptide; CII = collagen type II; HOCl = chlorination with hypochlorous acid; NEG = non-enzymatic glycation with ribose; SynP = synovial proteins; NO2 = nitration with peroxynitrite; pep = peptides; 3-NT = 3-nitrotyrosine; Hcy = homocysteinylation with homocysteine-thiolactone.

<sup>2</sup> Correction consisted in subtracting the OD against the unmodified protein or peptide from the OD against the corresponding modified protein or peptide for each subject.

### Supplementary Table S2

**OD obtained in the preliminary ELISA for anti-Hcy-HSA antibodies.** The samples correspond to 38 patients with established RA and 37 healthy controls. The results are shown as median values and the interquartile range (IQR). The comparison was done with the U of Mann-Whitney test.

| Antigen <sup>1</sup> | Correction <sup>2</sup> | Controls |              | RA patients |              | <i>P</i> |
|----------------------|-------------------------|----------|--------------|-------------|--------------|----------|
|                      |                         | Median   | IQR          | Median      | IQR          |          |
| ctr-HSA              | -                       | 0.179    | 0.139/0.262  | 0.182       | 0.152/0.281  | 0.8      |
| Hcy-HSA <sup>3</sup> | no                      | 0.171    | 0.147/0.250  | 0.186       | 0.146/0.264  | 0.6      |
| Hcy-HSA              | yes                     | -0.006   | -0.018/0.007 | 0.001       | -0.003/0.011 | 0.02     |

<sup>1</sup> Abbreviations: ctr = unmodified control protein or peptide; HSA = human serum albumin; Hcy = homocysteinylation with homocysteine-thiolactone.

<sup>2</sup> Correction consisted in subtracting the OD against the unmodified protein from the OD against the corresponding modified protein for each subject.

<sup>3</sup> HSA (Sigma-Merck, A8763) was reacted with 0.4 mM L-Hcy-thiolactone as described (Nowakowska-Plaza *et al.* 2014) leading to 0.81 nmol Hcy/mg protein without protein damage.
